**Erratum**

**Pepels, P. P. L. M., Wendelaar Bonga, S. E. and Balm, P. H. M.** (2004). Bacterial lipopolysaccharide (LPS) modulates corticotropin-releasing hormone (CRH) content and release in the brain of juvenile and adult tilapia (*Oreochromis mossambicus*; Teleostei). *J. Exp. Biol.* **207**, 4479-4488.

Unfortunately, when first published on-line, the title of this paper was incorrectly stated as 'Ontogeny of corticotropin-releasing factor and of hypothalamic-pituitary-interrenal axis responsiveness to stress in tilapia (*Oreochromis mossambicus*; Teleostei)'.

Readers who have downloaded this article with the incorrect title are requested to replace it with the corrected PDF.

The print version of this paper was unaffected by the error.
